# Supplementary material for: Exploring Diversity and Polymer Degrading Potential of Epiphytic Bacteria Isolated from Marine Macroalgae
Source: MDPI journal article supplement (doi:10.3390/microorganisms10122513), 2022-12-19
Supplement: s1 [file s1]

**Supplementary table S1: CFU counts and total number of bacterial isolates preserved from intertidal macroalgal samples on different media**

| SAMPLES<br>(ID)                                     | CFU/g of sample (No. of isolates preserved) |                                |                               |                            |                               |                            | Total |
|-----------------------------------------------------|---------------------------------------------|--------------------------------|-------------------------------|----------------------------|-------------------------------|----------------------------|-------|
|                                                     | TSBA                                        | TSBA (1:100)                   | R2A                           | MA                         | VNSS                          | SWC                        |       |
| <i>Ulva sp.</i> ,<br>Malwan (GA-MAL)                | 4.9 x 10 <sup>7</sup><br>(12)               | NG*                            | 4.0 x 10 <sup>5</sup> (6)     | 9.1 x 10 <sup>7</sup> (2)  | 1.2 x 10 <sup>7</sup><br>(11) | 1.1 x 10 <sup>7</sup> (11) | 42    |
| <i>Sargassum polycystum</i> ,<br>Malwan (MBA)       | 6.0 x 10 <sup>6</sup> (7)                   | 4.0 x 10 <sup>6</sup> (2)      | 6.0 x 10 <sup>6</sup> (4)     | 2.0 x 10 <sup>7</sup> (3)  | 3 x 10 <sup>6</sup> (2)       | 9.1 x 10 <sup>9</sup> (6)  | 24    |
| <i>Pterocladia musciformis</i><br>Malwan (MRA)      | 6.1 x 10 <sup>7</sup><br>(13)               | 4.0 x 10 <sup>3</sup> (7)      | 5.0 x 10 <sup>5</sup><br>(11) | 1.4 x 10 <sup>8</sup> (4)  | 1.6 x 10 <sup>8</sup> (6)     | 1.4 x 10 <sup>8</sup> (6)  | 47    |
| <i>Sargassum polycystum</i> ,<br>Anjuna (LLAB)      | 3.9 x 10 <sup>8</sup> (5)                   | 2.2 x 10 <sup>3</sup> (16)     | 2.03 x 10 <sup>5</sup><br>17) | 2.8 x 10 <sup>8</sup> (4)  | 1.9 x 10 <sup>8</sup> (3)     | 1.7 x 10 <sup>8</sup> (7)  | 52    |
| <i>Dictyota sp.</i> ,<br>Anjuna (SAB)               | 9.6 x 10 <sup>5</sup> (5)                   | 1.46 x 10 <sup>4</sup><br>(25) | 1.9 x 10 <sup>5</sup><br>(38) | 1.9 x 10 <sup>8</sup> (3)  | 1.2 x 10 <sup>8</sup> (4)     | 1.9 x 10 <sup>8</sup> (6)  | 81    |
| <i>Padina antillarum</i> ,<br>Cabo-De-Rama (CDR-SL) | 1.4 x 10 <sup>8</sup><br>(15)               | 1.7 x 10 <sup>8</sup> (5)      | 2.0 x 10 <sup>4</sup> (8)     | 4.7 x 10 <sup>8</sup> (19) | 3.6 x 10 <sup>8</sup><br>(14) | 4.8 x 10 <sup>7</sup> (13) | 74    |
| <i>Sargassum polycystum</i> ,<br>Kunkeshwar (LLKUN) | 1.1 x 10 <sup>8</sup><br>(10)               | NG*                            | 2.0 x 10 <sup>6</sup> (7)     | 1.1 x 10 <sup>9</sup> (3)  | 1.1 x 10 <sup>9</sup><br>(11) | 1.3 x 10 <sup>9</sup> (9)  | 40    |
| Total isolates                                      | 67                                          | 55                             | 91                            | 38                         | 51                            | 58                         | =360  |

**Supplementary table S2: List of total identified strains and their polymer degrading potentials (sample wise) with NCBI accession number.**

**1. Cellulose, 2. Xylan, 3. Pectin, 4. Starch**

| Sr. No.      | Strain              | Taxonomy                                  | 1 | 2 | 3 | 4  |
|--------------|---------------------|-------------------------------------------|---|---|---|----|
| <b>SAB</b>   |                     |                                           |   |   |   |    |
| <b>TSBA</b>  |                     |                                           |   |   |   |    |
| 1            | SAB 1<br>(MW173255) | <i>Bacillus coreaensis</i> (97.9)         | - | + | + | -  |
| 2            | SAB 2<br>(MT734468) | <i>Oceanobacillus caeni</i> (100)         | + | - | + | -  |
| 3            | SAB 3<br>(MW173256) | <i>Vibrio alginolyticus</i> (99.7)        | - | + | + | +  |
| <b>TSBAD</b> |                     |                                           |   |   |   |    |
| 4            | SAB 1<br>(MW180946) | <i>Vibrio fortis</i> (100)                | - | - | - | -  |
| 5            | SAB 2<br>(MW173258) | <i>Klebsiella oxytoca</i> (100)           | - | - | - | -  |
| 6            | SAB 3<br>(MH707108) | <i>Kosakonia sacchari</i> (99.9)          | - | - | - | -  |
| 7            | SAB 5<br>(MH707109) | <i>Enterobacter sichuanensis</i> (99.5)   | - | - | - | -  |
| 8            | SAB 7 (OP379650)    | <i>Cellulosimicrobium aquatile</i> (99.5) | + | + | + | ++ |

|            |                      |                                          |   |   |   |     |
|------------|----------------------|------------------------------------------|---|---|---|-----|
| 9          | SAB 8<br>(MH707111)  | <i>Cellulosimicrobium funkei</i> (94.8)  | - | - | - | ++  |
| 10         | SAB 10<br>(MW180945) | <i>Streptomyces albidoflavus</i> (99.8)  | + | - | + | +++ |
| 11         | SAB 14<br>(MH707116) | <i>Gordonia bronchialis</i> (95.36)      | - | - | - | -   |
| 12         | SAB 16<br>(MT947150) | <i>Brachybacterium squillarum</i> (100)  | - | - | - | ++  |
| 13         | SAB 17<br>(MW173259) | <i>Bacillus infantis</i> (99.8)          | + | + | + | +   |
| 14         | SAB 18<br>(MH707117) | <i>Bacillus infantis</i> (99.7)          | + | + | + | +   |
| 15         | SAB 19<br>(MH707118) | <i>Fictibacillus enclensis</i> (99.7)    | + | - | + | -   |
| 16         | SAB 20<br>(MH707119) | <i>Streptomyces hyaluromycini</i> (99.8) | + | - | + | -   |
| 17         | SAB 23<br>(MH707120) | <i>Brachybacterium squillarum</i> (99.8) | - | - | - | -   |
| 18         | SAB 24<br>(MH707121) | <i>Halobacillus yeomjeoni</i> (91.4)     | - | - | - | -   |
| 19         | SAB 25<br>(MH701858) | <i>Fredinandcohnia onubensis</i> (98.8)  | + | - | - | -   |
| 20         | SAB 26<br>(MH707122) | <i>Enterobacter asburiae</i> (99.6)      | - | - | - | -   |
| 21         | SAB 27<br>(MW173260) | <i>Bacillus acidiceler</i> (99.8)        | - | - | - | -   |
| <b>MA</b>  |                      |                                          |   |   |   |     |
| 22         | SAB 1<br>(MH707126)  | <i>Vibrio fortis</i> (99.8)              | - | + | - | +   |
| 23         | SAB 2<br>(MW173261)  | <i>Lederbergia wuyishanensis</i> (98.4)  | + | + | + | -   |
| 24         | SAB 3 (LN999519)     | <i>Marinomonas epiphytica</i> (100)      | - | - | - | -   |
| <b>R2A</b> |                      |                                          |   |   |   |     |
| 25         | SAB 1<br>(MH707128)  | <i>Enterobacter soli</i> (99.1)          | + | + | - | -   |
| 26         | SAB 2<br>(MH707129)  | <i>Aeromonas bivalvium</i> (99.8)        | + | + | - | +   |
| 27         | SAB 3<br>(MH707130)  | <i>Klebsiella michiganensis</i> (99.9)   | - | + | - | -   |
| 28         | SAB 4<br>(MH707131)  | <i>Cytobacillus firmus</i> (99.4)        | + | + | - | -   |
| 29         | SAB 11<br>(MH707135) | <i>Gordonia bronchialis</i> (98.8)       | - | + | - | -   |
| 30         | SAB 12<br>(MH707136) | <i>Kocuria palustris</i> (99.5)          | - | + | - | +   |
| 31         | SAB 13<br>(MH707137) | <i>Isoptericola chiayiensis</i> (99.7)   | - | + | - | ++  |
| 32         | SAB 14<br>(MH707138) | <i>Roseomonas mucosa</i> (100)           | + | + | - | +   |
| 33         | SAB 15<br>(MH707139) | <i>Gordonia westfalica</i> (99.9)        | + | - | - | -   |
| 34         | SAB 16<br>(MW173262) | <i>Bacillus pseudomycooides</i> (100)    | + | - | - | +   |
| 35         | SAB 18<br>(MH707140) | <i>Pantoea anthophila</i> (100)          | - | - | - | +   |
| 36         | SAB 19<br>(MH707141) | <i>Salinimonas lutimaris</i> (99.4)      | - | - | - | -   |
| 37         | SAB 20<br>(MH707142) | <i>Neobacillus cucumis</i> (98.5)        | + | + | + | +   |

|             |                      |                                                    |   |   |   |     |
|-------------|----------------------|----------------------------------------------------|---|---|---|-----|
| 38          | SAB 21<br>(MH707143) | <i>Bacillus altitudinis</i> (100)                  | - | - | - | -   |
| 39          | SAB 23<br>(MH707144) | <i>Priestia filamentosus</i> (100)                 | + | - | - | +   |
| 40          | SAB 25<br>(MW173263) | <i>Alkalihalobacillus algicola</i> (100)           | - | + | - | -   |
| 41          | SAB 27<br>(MH707146) | <i>Priestia aryabhatai</i> (99.9)                  | + | + | - | +   |
| 42          | SAB 28<br>(MH707147) | <i>Psychrobacter nivimaris</i> (100)               | + | + | - | +   |
| 43          | SAB 29<br>(MH707148) | <i>Kocuria palustris</i> (100)                     | - | + | - | -   |
| 44          | SAB 30<br>(MH707149) | <i>Psychrobacter nivimaris</i> (100)               | + | + | - | +   |
| 45          | SAB 31<br>(MH707150) | <i>Enterobacter asburiae</i> (99.6)                | - | - | - | -   |
| 46          | SAB 32<br>(MT734469) | <i>Microbacterium schleiferi</i> (99.17)           | - | - | - | +   |
| 47          | SAB 33<br>(MH707151) | <i>Staphylococcus warneri</i> (100)                | - | - | - | -   |
| 48          | SAB 34<br>(MH707152) | <i>Alkalihaloacillus algicola</i> (99.3)           | + | + | - | +   |
| 49          | SAB 35<br>(MH707153) | <i>Priestia filamentosa</i> (99.9)                 | + | - | - | -   |
| 50          | SAB 36<br>(MH707154) | <i>Bacillus Altitudinis</i> (99.9)                 | - | - | - | -   |
| 51          | SAB 37<br>(MH707155) | <i>Cobetia marina</i> (99.9)                       | - | + | - | -   |
| 52          | SAB 38<br>(LN879432) | <i>Domibacillus epiphytica</i> (100)               | - | - | - | -   |
| 53          | SAB 39<br>(MH707156) | <i>Gordonia rubripertincta</i> (99.8)              | - | - | + | +   |
| 54          | SAB 40<br>(MH707157) | <i>Janibacter indicus</i> (99.6)                   | - | - | + | +   |
| 55          | SAB 41<br>(MH707158) | <i>Vibrio barsiliensis</i> (99)                    | + | + | + | +   |
| 56          | SAB 42<br>(MH707159) | <i>Bacillus aerophilus</i> (100)                   | - | + | - | -   |
| 57          | SAB 45<br>(MH707160) | <i>Alkalihalobacillus algicola</i> (99.7)          | + | + | + | +   |
| 58          | SAB 52<br>(MH707161) | <i>Staphylococcus warneri</i> (100)                | - | - | - | -   |
| <b>SWC</b>  |                      |                                                    |   |   |   |     |
| 59          | SAB1 (MH707162)      | <i>Vibrio natriegens</i> (99.6)                    | + | + | + | ++  |
| 60          | SAB2 (MH707163)      | <i>Pseudoalteromonas shioyasakiensis</i><br>(99.7) | - | + | + | +   |
| 61          | SAB4 (MH707165)      | <i>Vibrio neocaldonicus</i> (99.8)                 | + | + | + | +++ |
| 62          | SAB5 (MH707166)      | <i>Rossellomorea marisflavi</i> (99.8)             | - | + | + | +   |
| 63          | SAB13<br>(MH707167)  | <i>Pseudoalteromonas distincta</i> (99.9)          | - | + | + | +   |
| <b>VNSS</b> |                      |                                                    |   |   |   |     |
| 64          | SAB-1<br>(MH707168)  | <i>Bacillus aerophilus</i> (96.4)                  | + | - | - | -   |
| 65          | SAB-3<br>(MH707169)  | <i>Vibrio neocaldonicus</i> (99.6)                 | - | - | + | +   |
| 66          | SAB-10<br>(MH707170) | <i>Pseudoalteromonas tetraodonis</i> (97.9)        | - | - | - | +   |

|                    |                         |                                                  |   |   |   |    |
|--------------------|-------------------------|--------------------------------------------------|---|---|---|----|
| 67                 | SAB-11<br>(MH707171)    | <i>Pseudoalteromonas agarivorans</i><br>(96.7)   | - | - | + | +  |
| <b>CDR-SL TSBA</b> |                         |                                                  |   |   |   |    |
| 68                 | CDR-SL 1<br>(MH707181)  | <i>Staphylococcus argenteus</i> (99.4)           | - | - | - | -  |
| 69                 | CDR-SL 3<br>(MH707182)  | <i>Vibrio owensii</i> (99.7)                     | + | - | + | +  |
| 70                 | CDR-SL 4<br>(MH707183)  | <i>Staphylococcus argenteus</i> (100)            | - | - | - | -  |
| 71                 | CDR-SL 5<br>(MH707184)  | <i>Psychrobacter nivimaris</i> (99.9)            | - | - | - | -  |
| 72                 | CDR-SL 7<br>(MH707186)  | <i>Metabacillus halosaccharovorans</i><br>(99.4) | + | + | + | -  |
| 73                 | CDR-SL 8<br>(OP379651)  | <i>Staphylococcus argenteus</i> (99.92)          | - | + | - | +  |
| 74                 | CDR-SL 10<br>(MH701859) | <i>Vibrio variabilis</i> (96.8)                  | - | - | + | -  |
| 75                 | CDR-SL 11<br>(MH707187) | <i>Vibrio neocaledonicus</i> (99.5)              | + | - | + | -  |
| 76                 | CDR-SL 12<br>(MH707188) | <i>Staphylococcus argenteus</i> (100)            | - | + | - | ++ |
| 77                 | CDR-SL 14<br>(MH707189) | <i>Staphylococcus argenteus</i> (99.7)           | - | + | - | ++ |
| 78                 | CDR-SL 16<br>(MW174850) | <i>Micrococcus luteus</i> (99.5)                 | + | - | + | +  |
| 79                 | CDR-SL 20<br>(MH707190) | <i>Staphylococcus epidermidis</i> (100)          | - | - | - | -  |
| 80                 | CDR-SL 21<br>(MH707191) | <i>Staphylococcus warneri</i> (100)              | - | - | - | -  |
| 81                 | CDR-SL 22<br>(MH707192) | <i>Staphylococcus caprae</i> (100)               | - | - | - | -  |
| <b>TSBAD</b>       |                         |                                                  |   |   |   |    |
| 82                 | CDR-SL 1<br>(MH707193)  | <i>Gordonia terrae</i> (99.7)                    | + | - | + | -  |
| 83                 | CDR-SL 2<br>(MH707194)  | <i>Niallia circulans</i> (99.5)                  | + | - | + | -  |
| 84                 | CDR-SL 4<br>(MH707195)  | <i>Micrococcus aloeverae</i> (99.9)              | + | - | + | -  |
| 85                 | CDR-SL 5<br>(MH707196)  | <i>Staphylococcus epidermidis</i> (99.8)         | - | - | + | +  |
| 86                 | CDR-SL 7<br>(MH707197)  | <i>Niallia circulans</i> (99.5)                  | - | + | + | +  |
| <b>MA</b>          |                         |                                                  |   |   |   |    |
| 87                 | CDR-SL 1<br>(MH707198)  | <i>Vibrio fortis</i> (99.9)                      | - | + | - | +  |
| 88                 | CDR-SL 3<br>(MH707199)  | <i>Kocuria sediminis</i> (100)                   | + | + | + | ++ |
| 89                 | CDR-SL 5<br>(MH707200)  | <i>Kocuria palustris</i> (99.9)                  | + | + | + | +  |
| 90                 | CDR-SL 7<br>(MH707201)  | <i>Planococcus okeanokoites</i> (99.9)           | + | + | + | +  |
| 91                 | CDR-SL 8<br>(MH707202)  | <i>Alteromonas macleodii</i> (99.6)              | - | - | + | +  |
| 92                 | CDR-SL 10<br>(MH707203) | <i>Rosellomorea marisflavi</i> (99.8)            | - | + | - | +  |
| 93                 | CDR-SL 11<br>(MH707204) | <i>Kocuria palustris</i> (99.6)                  | + | + | + | +  |
| 94                 | CDR-SL 12<br>(MH707205) | <i>Micrococcus terreus</i> (100)                 | - | + | + | +  |

|             |                            |                                            |   |    |   |     |
|-------------|----------------------------|--------------------------------------------|---|----|---|-----|
| 95          | CDR-SL 13<br>(MH707206)    | <i>Micrococcus endophyticus</i> (99.9)     | - | +  | + | +   |
| 96          | CDR-SL 14<br>(MW174849)    | <i>Kocuria palustris</i> (100)             | + | -  | + | +   |
| 97          | CDR-SL 15<br>(LN879436)    | <i>Luteimonas padinae</i> (100)            | - | +  | - | -   |
| 98          | CDR-SL 16<br>(MH707207)    | <i>Kocuria palustris</i> (100)             | - | +  | + | -   |
| 99          | CDR-SL 18<br>(MH707208)    | <i>Micrococcus endophyticus</i> (99.2)     | + | +  | + | +   |
| 100         | CDR-SL 26<br>(MW180944)    | <i>Streptomyces olivicoloratus</i> (100)   | + | +  | + | +   |
| 101         | CDR-SL 27<br>(MT734471)    | <i>Kocuria sediminis</i> (100)             | - | -  | + | [+] |
| 102         | CDR-SL 29<br>(MH707210)    | <i>Brevundimonas vesicularis</i> (99)      | - | -  | + | +   |
| 103         | CDR-SL 30<br>(MH707211)    | <i>Kocuria palustris</i> (100)             | - | -  | + | +   |
| 104         | CDR-SL 31<br>(MW180943)    | <i>Paracoccus marcusii</i> (99.9)          | - | -  | + | +   |
| 105         | CDR-SL 32<br>(MH707212)    | <i>Planomicrobium okeanoikoites</i> (99.8) | + | +  | + | +   |
| <b>R2A</b>  |                            |                                            |   |    |   |     |
| 106         | CDR-SL 6<br>(MH707215)     | <i>Sphingomonas molluscorum</i> (99.8)     | + | +  | - | +   |
| 107         | CDR-SL 8<br>(MH707217)     | <i>Staphylococcus epidermidis</i> (99.7)   | - | +  | - | -   |
| <b>SWC</b>  |                            |                                            |   |    |   |     |
| 108         | CDRSL1<br>(MW173264)       | <i>Vibrio owensii</i> (99)                 | + | +  | - | +   |
| 109         | CDRSL2<br>(MH707218)       | <i>Vibrio sonorensis</i> (99)              | + | -  | - | +   |
| 110         | CDRSL6<br>(MH707219)       | <i>Alteromonas macleodii</i> (99.6)        | - | +  |   | +   |
| 111         | CDRSL-7 SWC<br>(MH707220)  | <i>Vibrio hepatarius</i> (99.7)            | + | +  | + | +   |
| 112         | CDRSL-8<br>(MH707221)      | <i>Alteromonas macleodii</i> (99.7)        | + | +  | + | +   |
| 113         | CDRSL-9 SWC<br>(MH707222)  | <i>Vibrio tubiashii</i> (99.1)             | + | +  | - | +   |
| 114         | CDRSL-10 SWC<br>(MH707223) | <i>Alteromonas macleodii</i> (99.6)        | + | +  | - | +   |
| 115         | CDRSL-12<br>(MH707224)     | <i>Alteromonas macleodii</i> (99.9)        | + | +  | - | +   |
| 116         | CDRSL-16<br>(MH707225)     | <i>Alteromonas macleodii</i> (99.1)        | + | +  | + | +   |
| 117         | CDRSL-17<br>(MH707226)     | <i>Alteromonas macleodii</i> (99.6)        | + | ++ | + | ++  |
| 118         | CDRSL-18<br>(MH707227)     | <i>Alteromonas marina</i> (99.6)           | - | +  | + | +   |
| 119         | CDRSL-20<br>(MH707228)     | <i>Bacillus altitudinis</i> (99.9)         | + | +  | + | +   |
| 120         | CDRSL-23<br>(MH707229)     | <i>Alteromonas macleodii</i> (99.9)        | - | +  | - | +   |
| <b>VNSS</b> |                            |                                            |   |    |   |     |
| 121         | CDR-SL-1<br>(MH707230)     | <i>Vibrio corallilyticus</i> (97.8)        | + | +  | - | +   |

|                   |                             |                                                   |   |   |    |    |
|-------------------|-----------------------------|---------------------------------------------------|---|---|----|----|
| 122               | CDR-SL-2<br>(MT947141)      | <i>Alteromonas macleodii</i> (99.8)               | + | + | -  | +  |
| 123               | CDR-SL-3<br>(MW173265)      | <i>Alteromonas macleodii</i> (99.8)               | - | - | -  | +  |
| 124               | CDR-SL-5<br>(MT947143)      | <i>Vibrio maritimus</i> (99.0)                    | + | + | -  | +  |
| 125               | CDR-SL-6<br>(MH707233)      | <i>Vibrio corallilyticus</i> (99.5)               | + | + | -  | +  |
| 126               | CDR-SL-8<br>(MH707235)      | <i>Alteromonas macleodii</i> (100)                | - | + | -  | +  |
| 127               | CDR-SL-9<br>(MH707236)      | <i>Vibrio coralliilyticus</i> (98.9)              | + | + | -  | +  |
| 128               | CDR-SL-13<br>(MH707237)     | <i>Vibrio tubiashii</i> (99.5)                    | + | - | -  | +  |
| 129               | CDR-SL-19<br>(MH707238)     | <i>Brevundimonas vesicularis</i> (99.6)           | - | + | -  | +  |
| 130               | CDR-SL-21<br>(MH707239)     | <i>Photobacterium rosenbergii</i> (99.3)          | - | - | -  | -  |
| 131               | CDR-SL-24<br>(MH707240)     | <i>Vibrio tubiashii</i> (99.7)                    | + | + | -  | +  |
| 132               | CDR-SL-25<br>(MH707241)     | <i>Vibrio tubiashii</i> (99.4)                    | + | + | +  | +  |
| <b>GAMAL TSBA</b> |                             |                                                   |   |   |    |    |
| 133               | GAMAL13<br>(MT634725)       | <i>Micrococcus aloeverae</i> (100)                | + | - | +  | +  |
| 134               | GAMAL10<br>(MT634723)       | <i>Vibrio shilonii</i> (99.7)                     | + | + | -  | +* |
| 135               | GAMAL11<br>(MT634724)       | <i>Vibrio alginolyticus</i> (100)                 | + | + | +  | +  |
| <b>MA</b>         |                             |                                                   |   |   |    |    |
| 136               | GAMAL7<br>(MT634736)        | <i>Rosellomorea vietnamensis</i> (99.8)           | + | - | +  | +  |
| 137               | GAMAL8<br>(MT734473)        | <i>Pseudoalteromonas shioyasakiensis</i><br>(100) | + | + | +* | +  |
| <b>R2A</b>        |                             |                                                   |   |   |    |    |
| 138               | GAMAL1<br>(MT734472)        | <i>Staphylococcus epidermidis</i> (100)           | + | + | -  | +  |
| 139               | GAMAL13<br>(MW173267)       | <i>Staphylococcus epidermidis</i> (100)           | + | + | -  | +  |
| 140               | GAMAL11<br>(MW174844)       | <i>Sanguibacter inulinus</i> (99.7)               | - | - | -  | +  |
| 141               | GAMAL 2, R2A<br>(MT634726)  | <i>Exiguobacterium mexicanum</i> (100)            |   | + |    | +  |
| 142               | GAMAL3 R2A<br>(MW173268)    | <i>Rosellomorea oryzaecorticis</i> (96.7)         | + | + | +* | -  |
| 143               | GAMAL 12, R2A<br>(MW174845) | <i>Exiguobacterium mexicanum</i> (100)            |   | + |    | +  |
| <b>SWC</b>        |                             |                                                   |   |   |    |    |
| 144               | GAMAL1<br>(MT634727)        | <i>Vibrio neocaledonicus</i> (100)                | + | + | +  | +  |
| 145               | GAMAL2<br>(MT634728)        | <i>Vibrio owensii</i> (100)                       | + | + | +  | +  |
| 146               | GAMAL3<br>(MT634729)        | <i>Pseudoalteromonas undina</i> (99.8)            | + | + | +* | +  |
| 147               | GAMAL6<br>(MT634730)        | <i>Shewanella fidelis</i> (100)                   | - | - | +* | -  |
| 148               | GAMAL8<br>(OP379653)        | <i>Bacillus infantis</i> (99.3%)                  | + | + | +* | +  |

|             |                            |                                               |             |   |    |    |
|-------------|----------------------------|-----------------------------------------------|-------------|---|----|----|
| 149         | GAMAL9<br>(MT634731)       | <i>Shewanella fidelis</i> (100)               | +           | + | +  | +  |
| 150         | GAMAL10<br>(MT634732)      | <i>Rosellomorea marisflavi</i> (99.9)         | +           | + | +  | +  |
| <b>VNSS</b> |                            |                                               |             |   |    |    |
| 151         | GAMAL2<br>(MW173270)       | <i>Pseudoalteromonas issachenkonii</i> (99.8) | +           | + | -  | +  |
| 152         | GAMAL3<br>(MH703640)       | <i>Sphingomonas desiccabilis</i> (99.3)       | +           | - | -  | -  |
| 153         | GAMAL8<br>(MW173272)       | <i>Shewanella fidelis</i> (100)               | +           | + | -  | +  |
| 154         | GAMAL 9,<br>VNSS(MH703642) | <i>Streptomyces lavenduligriseus</i> (100)    | +           | + | +  | -  |
| 155         | GAMAL10<br>(MW174848)      | <i>Staphylococcus epidermidis</i> (100)       | +           | - | -  | -  |
| 156         | GAMAL11<br>(MW173273)      | <i>Bacillus altitudinis</i> (100)             | -           | + | -  | -  |
| 157         | GAMAL12<br>(MW174847)      | <i>Bacillus altitudinis</i> (100)             | +           | + | -  | -  |
| 158         | GAMAL13<br>(MW174846)      | <i>Shewanella fidelis</i> (100)               | +           | + | +  | -  |
| 159         | GAMAL14<br>(MW173271)      | <i>Pseudoalteromonas undina</i> (99.1)        | +           | - | -  | +  |
| <b>MBA</b>  |                            |                                               | <b>TSBA</b> |   |    |    |
| 160         | MBA2<br>(MT734492)         | <i>Kocuria indica</i> (100)                   | +           | + | ++ | +  |
| 161         | MBA5<br>(MT947147)         | <i>Bacillus coreansis</i> (99.5)              | +           | - | +  | +  |
| 162         | MBA7<br>(MH701874)         | <i>Bacillus megaterium</i> (99.8)             | +           | + | ++ | +  |
| 163         | MBA3<br>(MT734493)         | <i>Brevibacillus nitrificans</i> (100)        | +           | + | +  | -  |
| 164         | MBA4<br>(MW174838)         | <i>Kocuria palustris</i> (100)                | +           | + | +  | +  |
| <b>MA</b>   |                            |                                               |             |   |    |    |
| 165         | MBA3<br>(MT734491)         | <i>Moraxella osolensis</i> (99.3)             | -           | - | +  | +  |
| 166         | MBA2<br>(MT734490)         | <i>Priestia megaterium</i> (99.9)             | +           | + | +  | +  |
| <b>R2A</b>  |                            |                                               |             |   |    |    |
| 167         | MBA1<br>(MT734486)         | <i>Bacillus pseudomycooides</i> (99.4)        | +           | + | ++ | ++ |
| 168         | MBA3<br>(MT734487)         | <i>Cellulomonas fimi</i> (99.5)               | +           | + | ++ | ++ |
| 169         | MBA4<br>(MT734488)         | <i>Bacillus pseudomycooides</i> (98.8)        | -           | + | ++ | ++ |
| 170         | MBA5<br>(MT734489)         | <i>Microbacterium hydrothermale</i> (99.9)    | +           | - | -  | -  |
| <b>VNSS</b> |                            |                                               |             |   |    |    |
| 171         | MBA1<br>(MT947138)         | <i>Staphylococcus epidermidis</i> (100)       | +           | - | +  | -  |
| 172         | MBA2<br>(MT947137)         | <i>Staphylococcus epidermidis</i> (100)       | +           | + | +  | +  |
| 173         | MBA7<br>(MW173274)         | <i>Pseudoalteromonas tetraodonis</i> (99.90)  | +           | + | +  | +  |
| <b>MRA</b>  |                            |                                               | <b>MA</b>   |   |    |    |
| 174         | MRA1<br>(MT734505)         | <i>Vibrio nereis</i> (99.8)                   | +           | - | +  | +  |

|            |                       |                                             |   |   |    |    |
|------------|-----------------------|---------------------------------------------|---|---|----|----|
| 175        | MRA2<br>(MT734506)    | <i>Vibrio shilonii</i> (100)                | + | + | -  | +* |
| 176        | MRA4<br>(MT734507)    | <i>Vibrio neocaledonicus</i> (100)          | + | + | +* | +* |
| R2A        |                       |                                             |   |   |    |    |
| 177        | MRA1<br>(MT734494)    | <i>Priestia megaterium</i> (100)            | - | + | -  | +  |
| 178        | MRA2<br>(MT734495)    | <i>Neobacillus drenthensis</i> (99.7)       | + | + | ++ | ++ |
| 179        | MRA3<br>(MW174833)    | <i>Bacillus pseudomycolides</i> (98.9)      | + | + | ++ | ++ |
| 180        | MRA7<br>(MW173276)    | <i>Bacillus cereus</i> (99.9)               | + | + | ++ | +* |
| 181        | MRA12<br>(MT735153)   | <i>Bacillus mediterraneensis</i> (97.76)    | + | + | +  | +  |
| 182        | MRA14<br>(MT734496)   | <i>Priestia aryabhattai</i> (100)           | + | - | +* | ++ |
| 183        | MRA15<br>(MT734497)   | <i>Staphylococcus epidermidis</i> (100)     | + | + | -  | +  |
| MRA SWC    |                       |                                             |   |   |    |    |
| 184        | MRA1<br>(MW173277)    | <i>Microbacterium arborescens</i> (100)     | + | + | +  | -  |
| 185        | MRA2<br>(MW173278)    | <i>Pseudoalteromonas tetraodonis</i> (99.8) | + | + | +  | -  |
| 186        | MRA6<br>(MW173280)    | <i>Vibrio jasicida</i> (100)                | + | + | +  | -  |
| 187        | MRA8<br>(MW173281)    | <i>Vibrio parahaemolyticus</i> (99.9)       | + | + | +  | +* |
| 188        | MRA10<br>(MW173279)   | <i>Pseudoalteromonas tetraodonis</i> (99.9) | + | - | +  | +  |
| VNSS       |                       |                                             |   |   |    |    |
| 189        | MRA1<br>(MT947139)    | <i>Shewanella fidelis</i> (100)             | + | + | +  | -  |
| 190        | MRA2<br>(MW174836)    | <i>Pseudoalteromonas undina</i> (100)       | + | - | ++ | +  |
| 191        | MRA5<br>(MT947140)    | <i>Shewanella fidelis</i> (100)             | + | + | -  | -  |
| 192        | MRA6<br>(MW173283)    | <i>Vibrio azureus</i> (99.8)                | + | + | ++ | -  |
| 193        | MRA7<br>(MW174835)    | <i>Pseudoalteromonas undina</i> (99.6)      | + | + | ++ | -  |
| LLKUN TSBA |                       |                                             |   |   |    |    |
| 194        | LLKUN1<br>(MT734509)  | <i>Vibrio neocaledonicus</i> , (100)        | - | - | ++ | -  |
| 195        | LLKUN2<br>(MT734510)  | <i>Bacillus pseudomycolides</i> (98.62)     | + | + | ++ | +  |
| 196        | LLKUN4<br>(OP379652)  | <i>Priestia aryabhattai</i> (99.9)          | + | + | +* | +  |
| 197        | LLKUN5<br>(MT734512)  | <i>Microbacterium arborescens</i> (100)     | + | - | -  | -  |
| 198        | LLKUN7<br>(MT734513)  | <i>Vibrio neocaledonicus</i> , (100)        | + | - | +  | -  |
| 199        | LLKUN9<br>(MT734514)  | <i>Bacillus pseudomycolides</i> (98.6)      | - | + | +  | -  |
| 200        | LLKUN14<br>(MW174839) | <i>Bacillus australimaris</i> (100)         | + | - | +* | +  |
| MA         |                       |                                             |   |   |    |    |



|             |                       |                                                  |                     |   |    |   |
|-------------|-----------------------|--------------------------------------------------|---------------------|---|----|---|
| 201         | LLKUN4<br>(MT734508)  | <i>Pseudoalteromonas undina</i> (99.8)           | +                   | + | +  | + |
| <b>R2A</b>  |                       |                                                  |                     |   |    |   |
| 202         | LLKUN2<br>(MT734515)  | <i>Bacillus cereus</i> (100)                     | +                   | - | +  | + |
| 203         | LLKUN3<br>(MT947152)  | <i>Staphylococcus epidermidis</i> (100)          | +                   | + | +  | - |
| 204         | LLKUN14<br>(MT734516) | <i>Microbacterium enclense</i> (100)             | +                   | + | -  | - |
| <b>SWC</b>  |                       |                                                  |                     |   |    |   |
| 205         | LLKUN4<br>(MW173284)  | <i>Vibrio furnissi</i> (98.72)                   | -                   | - | -  | - |
| 206         | LLKUN5<br>(MW174840)  | <i>Pseudoalteromonas issachenkonii</i><br>(99.9) | +                   | + | +  | - |
| 207         | LLKUN8<br>(MW173285)  | <i>Bacillus cerus</i> (100)                      | +                   | - | +  | + |
| 208         | LLKUN9<br>(MW180941)  | <i>Bacillus pseudomyoides</i> (100)              | -                   | + | +  | + |
| 209         | LLKUN10<br>(MW173286) | <i>Brevibacillus gelatini</i> (99.7)             | +                   | - | +  | - |
| 210         | LLKUN12<br>(MW173287) | <i>Alteromonas australica</i> (99.7)             | +                   | + | -  | - |
| 211         | LLKUN14<br>(MW173288) | <i>Microbacterium enclense</i> (100)             | +                   | - | -  | - |
| <b>VNSS</b> |                       |                                                  |                     |   |    |   |
| 212         | LLKUN2<br>(MT734517)  | <i>Pseudoalteromonas issachenkonii</i><br>(99.8) | +                   | + | ++ | + |
| 213         | LLKUN3<br>(MT734518)  | <i>Vibrio hyugaensis</i> (100)                   | +                   | - | ++ | + |
| 214         | LLKUN5<br>(MT947136)  | <i>Alteromonas fortis</i> (99.7)                 | +                   | + | ++ | + |
| 215         | LLKUN7<br>(MW173292)  | <i>Alteromonas macleodii</i> (99.5)              | +                   | + | -  | + |
| 216         | LLKUN8<br>(MT947144)  | <i>Bacillus canaveralius</i> (98.5)              | +                   | - | -  | + |
| 217         | LLKUN10<br>(MW173289) | <i>Pseudoalteromonas tetraodonis</i> (100)       | +                   | + | ++ | + |
| 218         | LLKUN12<br>(MT947135) | <i>Staphylococcus epidermidis</i> (99.4)         | +                   | + | ++ | + |
| <b>LLAB</b> |                       |                                                  | <b>TSBA (1:100)</b> |   |    |   |
| 219         | LLAB2<br>(MT734482)   | <i>Neobacillus drentensis</i> (99.1)             | +                   | + | +  | + |
| <b>MA</b>   |                       |                                                  |                     |   |    |   |
| 220         | LLAB2<br>(MT734480)   | <i>Vibrio neocaledonicus</i> (100)               | +                   | - | +  | + |
| 221         | LLAB7<br>(MT734481)   | <i>Catenococcus thiocycli</i> (99.8)             | +                   | + | +  | + |
| 222         | LLAB8<br>(MW174843)   | <i>Vibrio kanaloae</i> (100)                     | +                   | + | +  | + |
| <b>R2A</b>  |                       |                                                  |                     |   |    |   |
| 223         | LLAB29<br>(MW174842)  | <i>Micrococcus yunnanensis</i> (100)             | +                   | - | -  | + |
| 224         | LLAB28<br>(MT734485)  | <i>Vibrio plantisponsor</i> (99.7)               | -                   | + | -  | - |
| 225         | LLAB26<br>(MT734484)  | <i>Bacillus tequilensis</i> (100)                | +                   | + | -  | + |
| 226         | LLAB22<br>(MW180940)  | <i>Paenibacillus lacus</i> (99.2)                | -                   | + | -  | - |

|             |                      |                                                  |   |   |   |   |
|-------------|----------------------|--------------------------------------------------|---|---|---|---|
| 227         | LLAB19<br>(MW174841) | <i>Brevibacillus limnophilus</i> (100)           | - | - | - | - |
| 228         | LLAB18<br>(MT734483) | <i>Streptomyces albidoflavus</i> (99.8)          | + | + | - | + |
| 229         | LLAB15<br>(MT947146) | <i>Bacillus cereus</i> (99.4)                    | + | + | - | + |
| <b>SWC</b>  |                      |                                                  |   |   |   |   |
| 230         | LLAB1<br>(MT734474)  | <i>Vibrio hyugaensis</i> (100)                   | + | - | - | - |
| 231         | LLAB2<br>(MT734475)  | <i>Vibrio hyugaensis</i> (100)                   | + | + | + | - |
| 232         | LLAB3<br>(MT734476)  | <i>Vibrio hyugaensis</i> (100)                   | + | - | - | + |
| 233         | LLAB5<br>(MT734477)  | <i>Vibrio sonorensis</i> (100)                   | - | + | + | - |
| 234         | LLAB7<br>(MT734478)  | <i>Pseudoalteromonas issachenkonii</i><br>(99.6) | + | + | - | + |
| 235         | LLAB8<br>(MT734479)  | <i>Vibrio hyugaensis</i> (100)                   | - | + | - | - |
| 236         | LLAB9<br>(MW173295)  | <i>Vibrio owensii</i> (99.82)                    | + | + | + | + |
| <b>VNSS</b> |                      |                                                  |   |   |   |   |
| 237         | LLAB4<br>(MW173296)  | <i>Vibrio japonicas</i> (99.8)                   | + | - | + | + |
| 238         | LLAB8<br>(OK161099)  | <i>Vibrio alginolyticus</i> (100)                | + | + | + | + |

'+' weakly positive

**Supplementary table S3: Sample wise distribution profile of unique and shared taxa**

| Genus                      | SAB | CDRSL | GAMAL | LLKUN | LLAB | MRA | MBA |
|----------------------------|-----|-------|-------|-------|------|-----|-----|
| <i>Actinobacteria</i>      |     |       |       |       |      |     |     |
| <i>Brachybacterium</i>     | 2   | 0     | 0     | 0     | 0    | 0   | 0   |
| <i>Cellulomonas</i>        | 0   | 0     | 0     | 0     | 0    | 0   | 1   |
| <i>Cellulosimicrobium</i>  | 2   | 0     | 0     | 0     | 0    | 0   | 0   |
| <i>Gordonia</i>            | 4   | 1     | 0     | 0     | 0    | 0   | 0   |
| <i>Isoptericola</i>        | 1   | 0     | 0     | 0     | 0    | 0   | 0   |
| <i>Janibacter</i>          | 1   | 0     | 0     | 0     | 0    | 0   | 0   |
| <i>Kocuria</i>             | 2   | 7     | 0     | 0     | 0    | 0   | 2   |
| <i>Microbacterium</i>      | 1   | 0     | 0     | 3     | 0    | 1   | 1   |
| <i>Micrococcus</i>         | 0   | 5     | 1     | 0     | 1    | 0   | 0   |
| <i>Sanguibacter</i>        | 0   | 0     | 1     | 0     | 0    | 0   | 0   |
| <i>Streptomyces</i>        | 2   | 1     | 1     | 0     | 1    | 0   | 0   |
| <i>Alphaproteobacteria</i> |     |       |       |       |      |     |     |
| <i>Brevundimonas</i>       | 0   | 2     | 0     | 0     | 0    | 0   | 0   |
| <i>Luteimonas</i>          | 0   | 1     | 0     | 0     | 0    | 0   | 0   |
| <i>Paracoccus</i>          | 0   | 1     | 0     | 0     | 0    | 0   | 0   |
| <i>Roseomonas</i>          | 1   | 0     | 0     | 0     | 0    | 0   | 0   |
| <i>Sphingomonas</i>        | 0   | 1     | 1     | 0     | 0    | 0   | 0   |

| <i>Bacilli</i>                    |   |    |   |   |    |   |   |
|-----------------------------------|---|----|---|---|----|---|---|
| <i>Alkalihalobacillus</i>         | 3 | 0  | 0 | 0 | 0  | 0 | 0 |
| <i>Bacillus</i>                   | 9 | 1  | 4 | 8 | 2  | 3 | 4 |
| <i>Brevibacillus</i>              | 1 | 0  | 0 | 1 | 1  | 0 | 1 |
| <i>Cytobacillus</i>               | 1 | 0  | 0 | 0 | 0  | 0 | 0 |
| <i>Domibacillus</i>               | 1 | 0  | 0 | 0 | 0  | 0 | 0 |
| <i>Exiguobacterium</i>            | 0 | 0  | 2 | 0 | 0  | 0 | 0 |
| <i>Fictibacillus</i>              | 1 | 0  | 0 | 0 | 0  | 0 | 0 |
| <i>Fredinandcohnia</i>            | 1 | 0  | 0 | 0 | 0  | 0 | 0 |
| <i>Halobacillus</i>               | 1 | 0  | 0 | 0 | 0  | 0 | 0 |
| <i>Lederbergia</i>                | 1 | 0  | 0 | 0 | 0  | 0 | 0 |
| <i>Metabacillus</i>               | 0 | 1  | 0 | 0 | 0  | 0 | 0 |
| <i>Niallia</i>                    | 0 | 2  | 0 | 0 | 0  | 0 | 0 |
| <i>Neobacillus</i>                | 1 | 0  | 0 | 0 | 1  | 1 | 0 |
| <i>Oceanobacillus</i>             | 1 | 0  | 0 | 0 | 0  | 0 | 0 |
| <i>Paenibacillus</i>              | 0 | 0  | 0 | 0 | 1  | 0 | 0 |
| <i>Planococcus</i>                | 0 | 1  | 0 | 0 | 0  | 0 | 0 |
| <i>Planomicrobium</i>             | 0 | 1  | 0 | 0 | 0  | 0 | 0 |
| <i>Priestia</i>                   | 3 | 0  | 0 | 1 | 0  | 2 | 1 |
| <i>Rossellomorea</i>              | 0 | 1  | 2 | 0 | 0  | 0 | 0 |
| <i>Staphylococcus</i>             | 2 | 10 | 3 | 2 | 0  | 1 | 0 |
| <b><i>Gammaproteobacteria</i></b> |   |    |   |   |    |   |   |
| <i>Aeromonas</i>                  | 1 | 0  | 0 | 0 | 0  | 0 | 0 |
| <i>Alteromonas</i>                | 0 | 12 | 0 | 3 | 0  | 0 | 0 |
| <i>Catenococcus</i>               | 0 | 0  | 0 | 0 | 1  | 0 | 0 |
| <i>Cobetia</i>                    | 1 | 0  | 0 | 0 | 0  | 0 | 0 |
| <i>Enterobacter</i>               | 4 | 0  | 0 | 0 | 0  | 0 | 0 |
| <i>Klebsiella</i>                 | 2 | 0  | 0 | 0 | 0  | 0 | 0 |
| <i>kosakonia</i>                  | 1 | 0  | 0 | 0 | 0  | 0 | 0 |
| <i>Marinomonas</i>                | 1 | 0  | 0 | 0 | 0  | 0 | 0 |
| <i>Moraxella</i>                  | 0 | 0  | 0 | 0 | 0  | 0 | 1 |
| <i>Pantoea</i>                    | 1 | 0  | 0 | 0 | 0  | 0 | 0 |
| <i>Photobacterium</i>             | 0 | 1  | 0 | 0 | 0  | 0 | 0 |
| <i>Pseudoalteromonas</i>          | 4 | 0  | 4 | 4 | 1  | 4 | 1 |
| <i>Psychrobacter</i>              | 2 | 1  | 0 | 0 | 0  | 0 | 0 |
| <i>Salinimonas</i>                | 1 | 0  | 0 | 0 | 0  | 0 | 0 |
| <i>Shewanella</i>                 | 0 | 0  | 4 | 0 | 0  | 2 | 0 |
| <i>Vibrio</i>                     | 7 | 15 | 4 | 4 | 11 | 6 | 2 |

|  |                    |
|--|--------------------|
|  | Unique among SAB   |
|  | Unique among CDRSL |
|  | Unique among LLAB  |
|  | Unique among MBA   |
|  | Unique among GAMAL |
|  | Unique among LLKUN |

|  |                                           |
|--|-------------------------------------------|
|  | Shared among CDRSL/LLKUN                  |
|  | Shared among SAB/LLKUN/LLAB/MBA           |
|  | Shared among SAB/CDRSL                    |
|  | Shared among SAB/CDRSL/MBA                |
|  | Shared among SAB/MRA/MBA                  |
|  | Shared among SAB/LLKUN/MRA/MBA            |
|  | Shared among CDRSL/GAMAL/LLAB             |
|  | Shared among GAMAL/MRA                    |
|  | Shared among CDRSL/GAMAL                  |
|  | Shared among SAB/CDRSL/GAMAL/MRA          |
|  | Shared among SAB/CDRSL/GAMAL/LLAB         |
|  | Shared among SAB/GAMAL/LLKUN/LLAB/MRA/MBA |
|  | Shared among all                          |

**Supplementary Table S4: Comparative analysis of the present study with previous reports of epiphytic bacterial community**

| S. NO |                           | Climate         | Sampling sites | Algae       |                                                                                  | Media                                                                                                                                                                                                               | Taxa Identified (Genus)                                                                                                                                                                                                                                                                                                                                                                                                                                                                                                                             | Polymer activity                                                     |
|-------|---------------------------|-----------------|----------------|-------------|----------------------------------------------------------------------------------|---------------------------------------------------------------------------------------------------------------------------------------------------------------------------------------------------------------------|-----------------------------------------------------------------------------------------------------------------------------------------------------------------------------------------------------------------------------------------------------------------------------------------------------------------------------------------------------------------------------------------------------------------------------------------------------------------------------------------------------------------------------------------------------|----------------------------------------------------------------------|
| 1     | Present study             | Tropical, Humid | Goa, India     | Rhodophyta  | <i>Pterocladia musciformis</i>                                                   | Soyabean casein digest (TSBA), Soyabean casein digest diluted (TSBAD), Marine agar (MA), reasoner's 2 agar (R2A), Seawater complex agar medium (SWC medium), Vaatanen nine salt solution agar medium (VNSSA medium) | <i>Vibrio</i> , <i>Bacillus</i> , <i>Pseudoalteromonas</i> , <i>Alteromonas</i> , <i>Staphylococcus</i> , <i>Kocuria</i> , <i>Micrococcus</i> , <i>streptomyces</i> , <i>Microbacterium</i> , <i>Shewanella</i> , <i>Marinomonas</i> , <i>Sphingomonas</i> , <i>Gordonia</i> , <i>Psychrobacter</i> , and <i>Enterobacter</i> etc. (only abundant taxa for rare <1% refer to figure 3)                                                                                                                                                              | Cellulase, Amylase, Xylanase, Pectinase, Sugarcane bagasse hydrolase |
|       |                           |                 |                | Phaeophyta  | <i>Sargassum polycystum</i> , <i>Padina antillarum</i> , and <i>Dictyota</i> sp. |                                                                                                                                                                                                                     |                                                                                                                                                                                                                                                                                                                                                                                                                                                                                                                                                     |                                                                      |
|       |                           |                 |                | Chlorophyta | <i>Ulva</i> sp.                                                                  |                                                                                                                                                                                                                     |                                                                                                                                                                                                                                                                                                                                                                                                                                                                                                                                                     |                                                                      |
| 2     | Barbato et al., 2022 [61] | Temperate       | South portugal | Rhodophyta  | <i>Asparagopsis taxiformis</i>                                                   | Marine agar, DSMZ medium 950                                                                                                                                                                                        | <i>Alteromonas</i> , <i>Celeribacter</i> , <i>Photobacterium</i> , <i>Pseudoalteromonas</i> , <i>Shewanella</i> , <i>Vibrio</i> , <i>Bacillus</i> , <i>Fictibacillus</i> , <i>Halobacillus</i> , <i>Thalassobacillus</i> , <i>Lacinutrix</i> , <i>Lutibacter</i> , <i>Winogradskiella</i> , <i>Aestuuriibacter</i> , <i>Alcanivorax</i> , <i>Micrococcus</i> , <i>Algibacter</i> , <i>Arenibacter</i> , <i>Cellulophaga</i> , <i>Zobellia</i> , <i>Terribacillus</i> , <i>Huaishuia</i> , <i>Labrenzia</i> , <i>Paracoccus</i> , and <i>Cobetia</i> | Agarase, Algnate, Pectinase, and Amylase                             |
|       |                           |                 |                |             | <i>Sphaerococcus coronopifolius</i>                                              |                                                                                                                                                                                                                     |                                                                                                                                                                                                                                                                                                                                                                                                                                                                                                                                                     |                                                                      |
|       |                           |                 |                | Pheophyta   | <i>Halopteris scoparia</i>                                                       |                                                                                                                                                                                                                     |                                                                                                                                                                                                                                                                                                                                                                                                                                                                                                                                                     |                                                                      |

|   |                             |                         |                               |             |                                                                 |                                                                                                                                                                    |                                                                                                                                                                                                                                                  |                                                           |
|---|-----------------------------|-------------------------|-------------------------------|-------------|-----------------------------------------------------------------|--------------------------------------------------------------------------------------------------------------------------------------------------------------------|--------------------------------------------------------------------------------------------------------------------------------------------------------------------------------------------------------------------------------------------------|-----------------------------------------------------------|
| 3 | Abdullah et al., 2020 [15]  | Tropical, Humid         | Kedah, Malaysia               | Rhodophyta  | <i>Gracilaria sp.</i>                                           | Marine agar, Actinomycetes isolation agar, Seawater agar, Seawater+ KBr, Seawater+ KI, Seawater+ NaCl, Seawater+NH <sub>4</sub> Cl, and Seawater+NaNO <sub>3</sub> | <i>Bacillus</i> , <i>Labrenzia</i> , <i>Microbulbifer</i> , <i>Virgibacillus</i> , <i>Alkanivorax</i> , <i>Stapia</i> , <i>Flavobacterium</i> , <i>Solibacillus</i> , <i>Sphingobacterium</i> , <i>Streptomyces</i> , and <i>Erythrobacter</i>   | NA                                                        |
| 4 | Naik et al., 2018 [17]      | Tropical, Humid         | Goa, India                    | Chlorophyta | <i>Ulva lactuca</i>                                             | Seawater agar medium                                                                                                                                               | <i>Vibrio</i> , <i>Bacillus</i> , and <i>Pseudomonas</i>                                                                                                                                                                                         | Cellulase, Amylase, protease, Agarase, Carrageenase       |
| 5 | Hinojosa et al., 2018 [16]  | Temperate               | King George Island, Peninsula | Rhodophyta  | <i>Pantoneura plocamioides</i> , <i>Plocamium cartilagineum</i> | Marine agar, Seawater agar                                                                                                                                         | <i>Pseudoalteromonas</i> , <i>Paraglaciacola</i> , <i>Colwellia</i> , <i>Cellulophaga</i> , <i>Olleya</i> , <i>Lacinutrix</i> , and <i>Winogradskyella</i>                                                                                       | Agarase                                                   |
|   |                             |                         |                               | Phaeophyta  | <i>Himantothallus grandifolius</i>                              |                                                                                                                                                                    |                                                                                                                                                                                                                                                  |                                                           |
| 6 | Wang et al., 2017 [60]      | Sub-tropical            | Nanhuangcheng Island          | Pheophyta   | <i>Laminaria japonica</i>                                       | Seawater                                                                                                                                                           | <i>Paenibacillus</i> , <i>Bacillus</i> , <i>Leclercia</i> , <i>Isoptericola</i> , <i>Planomicrobium</i> , <i>Pseudomonas</i> , <i>Lysinibacillus</i> , and <i>Sphingomonas</i>                                                                   | Alginate                                                  |
|   |                             |                         |                               |             | <i>Sargassum horneri</i>                                        |                                                                                                                                                                    |                                                                                                                                                                                                                                                  |                                                           |
|   |                             |                         |                               |             | <i>Sargassum siliquastrum</i>                                   |                                                                                                                                                                    |                                                                                                                                                                                                                                                  |                                                           |
| 7 | Alvarado et al., 2017 [53]  | Temperate               | King George Island, Peninsula | Rhodophyta  | <i>Iridaea cordata</i> , <i>Pantoneura plocamioides</i>         | Marine agar and Seawater agar                                                                                                                                      | <i>Algibacter</i> , <i>Cellulophaga</i> , <i>Zobellia</i> , <i>Arthrobacter</i> , <i>Brachybacterium</i> , <i>Citrococcus</i> , <i>Labedella</i> , <i>Microbacterium</i> , <i>Micrococcus</i> , <i>Sanguibacter</i> , and <i>Salinibacterium</i> | Agarase                                                   |
|   |                             |                         |                               | Phaeophyta  | <i>Adenocystis utricularis</i>                                  |                                                                                                                                                                    |                                                                                                                                                                                                                                                  |                                                           |
|   |                             |                         |                               | Chlorophyta | <i>Monostroma hariotii</i>                                      |                                                                                                                                                                    |                                                                                                                                                                                                                                                  |                                                           |
| 8 | Rodrigues et al., 2017 [18] | Humid temperate oceanic | Wales, UK                     | Chlorophyta | <i>Ulva sp.</i>                                                 | Marine agar                                                                                                                                                        | <i>Vibrio</i> , <i>Halomonas</i> , <i>Cobetia</i> , <i>Psychromonas</i> , <i>Pseudoalteromonas</i> , <i>Zymobacter</i> , <i>Moritella</i> , <i>Photobacterium</i> , <i>Winogradskyella</i> , and <i>Allivibrio</i>                               | Ulvase, hydrolase, Carbohydrate sulphatase, and Cellulase |
| 9 | Vieira et al., 2016 [59]    | Semi-tropical           | Noumea lagoon, New Caledonia  | Phaeophyta  | <i>Lobophora</i>                                                | Marine agar (MA)                                                                                                                                                   | <i>Rugeria</i> , <i>Thalassomonas</i> , <i>Vibrio</i> , <i>Microbulbifer</i> , <i>Tanacibaculum</i> , <i>Paramoritella</i> , <i>Shimia</i> , <i>Erythrobacter</i> , <i>Muricauda</i> , and <i>Bacillus</i>                                       | NA                                                        |

|    |                           |                       |                                                  |            |                             |                                                                                            |                                                                                                                                                                                                                             |    |
|----|---------------------------|-----------------------|--------------------------------------------------|------------|-----------------------------|--------------------------------------------------------------------------------------------|-----------------------------------------------------------------------------------------------------------------------------------------------------------------------------------------------------------------------------|----|
| 10 | Albakosh et al., 2016 [9] | Subtropical temperate | Rooi Els, Cape town (South Africa)               | Phaeophyta | <i>Splachnidium rugosum</i> | Thiosulphate citrate bile sucrose agar, Marine agar, Nutrient agar, Nutrient seawater agar | <i>Vibrio</i> , <i>Pseudoalteromonas</i> , <i>Alteromonas</i> , <i>Psychromonas</i> , <i>Pseudomonas</i> , <i>Neptumonas</i> , <i>Cobetia</i> , <i>Shewanella</i> , <i>Sphingomonas</i> , and <i>Sulfitobacter</i>          | NA |
| 11 | Menzes et al., 2009 [52]  | Tropical, Subtropical | Sao Sebastiao region and Sao Paulo State, Brazil | Pheophyta  | <i>Sargassum sp.</i>        | Glucose peptone yeast extract (GPY medium), Marine agar (MA), Tryptic soya agar (TSA)      | <i>Arthrobacter</i> , <i>Bacillus</i> , <i>Brevundimonas</i> , <i>Dokdonia</i> , <i>Knoellia</i> , <i>Kocuria</i> , <i>Micrococcus</i> , <i>Nocardiodetes</i> , <i>Ruegeria</i> , <i>Staphylococcus</i> , and <i>Vibrio</i> | NA |

**Supplementary Table S5: List of potential novel isolates.**

| Sr. | Sample ID     | Accession No. | 16S rRNA gene sequencing (% similarity)     | Putative taxonomic affiliation | Remarks                                                            |
|-----|---------------|---------------|---------------------------------------------|--------------------------------|--------------------------------------------------------------------|
| 1   | SAB-1 TSBA    | MW173255      | <i>Bacillus coreaensis</i> (97.9)           | <i>Firmicutes</i>              |                                                                    |
| 2   | SAB-8 TSBAD   | MH707111      | <i>Cellulosimicrobium funkei</i> (94.8)     | <i>Actinobacteria</i>          |                                                                    |
| 3   | SAB-38 R2A    | LN879432      | <i>Domibacillus epiphyticus</i> (100)       | <i>Firmicutes</i>              | <i>Domibacillus epiphyticus</i> sp. nov. Verma et al., (2017) [76] |
| 4   | SAB-14 TSBAD  | MH707116      | <i>Gordonia bronchialis</i> (95.3)          | <i>Actinobacteria</i>          |                                                                    |
| 5   | SAB-24 TSBAD  | MH707121      | <i>Halobacillus yeomjeoni</i> (91.4)        | <i>Firmicutes</i>              |                                                                    |
| 6   | SAB-2 MA      | MW173261      | <i>Lederbergia wuyishanensis</i> (98.4)     | <i>Firmicutes</i>              |                                                                    |
| 7   | SAB-3 MA      | LN999519      | <i>Marinomonas epiphytica</i> (100)         | <i>Gamma-proteobacteria</i>    | <i>Marinomonas epiphytica</i> sp. nov. Ojha et al., (2017) [37]    |
| 8   | SAB-20 R2A    | MH707142      | <i>Neobacillus Cucumis</i> (98.5)           | <i>Firmicutes</i>              |                                                                    |
| 9   | SAB-1 VNSS    | MH707168      | <i>Bacillus aerophilus</i> (96.4)           | <i>Firmicutes</i>              |                                                                    |
| 10  | SAB-10 VNSS   | MH707170      | <i>Pseudoalteromonas tetraodonis</i> (97.9) | <i>Gamma-proteobacteria</i>    |                                                                    |
| 11  | SAB-11 VNSS   | MH707171      | <i>Pseudoalteromonas agarivornas</i> (96.7) | <i>Gamma-proteobacteria</i>    |                                                                    |
| 12  | CDRSL-10 TSBA | MH701859      | <i>Vibrio variabilis</i> (96.8)             | <i>Gamma-proteobacteria</i>    |                                                                    |
| 13  | CDRSL-15 MA   | LN879436      | <i>Luteimonas padinae</i> (100)             | <i>Gamma-proteobacteria</i>    | <i>Luteimonas padinae</i> sp. nov. Verma et al., 2016 [77]         |

|    |              |          |                                             |                             |  |
|----|--------------|----------|---------------------------------------------|-----------------------------|--|
| 14 | CDRSL-1 VNSS | MH707230 | <i>Vibrio corallilyticus</i> (97.8)         | <i>Gamma-proteobacteria</i> |  |
| 15 | GAMAL-3 R2A  | MW173268 | <i>Rossellomorea oryzaecorticis</i> (96.7)  | <i>Firmicutes</i>           |  |
| 16 | MRA-12 R2A   | MT735153 | <i>Bacillus massilioalgeriensis</i> (97.13) | <i>Firmicutes</i>           |  |
| 17 | LLKUN-2 TSBA | MT734510 | <i>Bacillus pseudomycooides</i> (98.6)      | <i>Firmicutes</i>           |  |
| 18 | LLKUN-9 TSBA | MT734514 | <i>Bacillus pseudomycooides</i> (98.6)      | <i>Firmicutes</i>           |  |
| 19 | LLKUN-4 SWC  | MW173284 | <i>Vibrio furnissi</i> (98.72)              | <i>Gamma-proteobacteria</i> |  |
| 20 | LLKUN-8 VNSS | MT947144 | <i>Bacillus canaveralius</i> (98.5)         | <i>Firmicutes</i>           |  |

**Supplementary table S6: Raw sugarcane bagasse degradation potential of strains from macroalgae.**

| Sr. | Isolates     | Identity                        | Sugarcane bagasse |
|-----|--------------|---------------------------------|-------------------|
| 1   | GAMAL-2 SWC  | <i>Vibrio owensii</i>           | ++                |
| 2   | GAMAL-8 SWC  | <i>Bacillus infantis</i>        | ++                |
| 3   | GAMAL-10 SWC | <i>Rossellomorea marisflavi</i> | ++                |
| 4   | LLAB-2 TSBAD | <i>Neobacillus derentis</i>     | ++                |
| 5   | LLKUN-4 TSBA | <i>Bacillus Pseudomycooides</i> | +                 |
| 6   | MRA-3 R2A    | <i>Bacillus pseudomycooides</i> | +                 |
| 7   | MRA-7 R2A    | <i>Bacillus cereus</i>          | +                 |
| 8   | SAB 20 R2A   | <i>Neobacillus cucumis</i>      | W+                |
| 9   | SAB 18 TSBAD | <i>Bacillus infentis</i>        | W+                |

\*“++”: highly positive; “+”: positive; “W+”: weakly positive
